# Supplementary material for: Comparison of the effects of early intensified induction chemotherapy and standard 3+7 chemotherapy in adult patients with acute myeloid leukemia
Source: PubMed Central journal article supplement — Blood Res. 2017 Sep 25;52(3):174–83. doi: 10.5045/br.2017.52.3.174 (PMC5641509; doi:10.5045/br.2017.52.3.174), 2017-09-25
Supplement: br-52-174-s001.pdf [file br-52-174-s001.pdf]

**Supplementary Table 1.** Early treatment outcomes according to the intensity of the BHAC-based induction chemotherapy.

| Total (N=752)                                         | IDA/BHAC 3/7 (N=181) | IDA/BHAC 3/10 (N=287) | IDA/BHAC 5/10 (N=284) | P                    |
|-------------------------------------------------------|----------------------|-----------------------|-----------------------|----------------------|
| Post-induction early death <sup>a)</sup> (N=38, 5.1%) | 14 (7.7%)            | 10 (3.5%)             | 14 (4.9%)             | 0.123                |
| ≤ 55 yr (N=651)                                       | 9/137 (6.6%)         | 5/246 (2.0%)          | 11/268 (4.1%)         | 0.082                |
| > 55 yr (N=101)                                       | 5/44 (11.4%)         | 5/41 (12.2%)          | 3/16 (18.8%)          | 0.741                |
| Favorable-risk (N=176)                                | 3/32 (9.4%)          | 1/55 (1.8%)           | 4/89 (4.5%)           | 0.264                |
| Intermediate-risk (N=400)                             | 7/104 (6.7%)         | 7/171 (4.1%)          | 4/125 (3.2%)          | 0.414                |
| Adverse-risk (N=169)                                  | 4/43 (9.3%)          | 2/59 (3.4%)           | 6/67 (9.0%)           | 0.387                |
| CR after induction CTx (N=537, 71.4%)                 | 105 (58.0%)          | 219 (76.3%)           | 213 (75.0%)           | <0.001 <sup>b)</sup> |
| ≤ 55 yr (N=651)                                       | 84/137 (61.3%)       | 196/246 (79.7%)       | 205/268 (76.5%)       | <0.001 <sup>b)</sup> |
| > 55 yr (N=101)                                       | 21/44 (47.7%)        | 23/41 (56.1%)         | 8/16 (50.0%)          | 0.736                |
| Favorable-risk                                        | 27/32 (84.4%)        | 52/55 (94.5%)         | 82/89 (92.1%)         | 0.249                |
| Intermediate-risk                                     | 58/104 (55.8%)       | 127/171 (74.3%)       | 90/125 (72.0%)        | 0.004 <sup>b)</sup>  |
| Adverse-risk                                          | 20/43 (46.5%)        | 39/59 (66.1%)         | 41/67 (61.2%)         | 0.126                |
| Final CR achievement (N=600, 79.8%)                   | 123 (68.0%)          | 242 (84.3%)           | 235 (82.7%)           | <0.001 <sup>b)</sup> |
| ≤ 55 yr (N=651)                                       | 102/137 (74.5%)      | 214/246 (87.0%)       | 225/268 (84.0%)       | 0.006 <sup>b)</sup>  |
| > 55 yr (N=101)                                       | 21/44 (47.7%)        | 28/41 (68.3%)         | 10/16 (62.5%)         | 0.148                |
| Favorable-risk                                        | 29/32 (90.6%)        | 53/55 (96.4%)         | 84/89 (94.4%)         | 0.537                |
| Intermediate-risk                                     | 72/104 (69.2%)       | 141/171 (82.5%)       | 103/125 (82.4%)       | 0.018 <sup>b)</sup>  |
| Adverse-risk                                          | 22/43 (51.2%)        | 46/59 (78.0%)         | 47/67 (70.1%)         | 0.015 <sup>b)</sup>  |
| Relapse before HCT (N=72, 13.2%)                      | 23/123 (18.7%)       | 26/242 (10.7%)        | 23/235 (9.8%)         | 0.035 <sup>b)</sup>  |
| ≤ 55 yr                                               | 17/102 (16.6%)       | 21/214 (9.8%)         | 21/225 (9.3%)         | 0.115                |
| > 55 yr                                               | 6/21 (28.6%)         | 5/28 (17.8%)          | 2/10 (20.0%)          | 0.660                |
| Favorable-risk                                        | 2/29 (6.9%)          | 1/53 (1.9%)           | 3/84 (3.6%)           | 0.509                |
| Intermediate-risk                                     | 16/72 (22.2%)        | 15/141 (10.6%)        | 12/103 (11.6%)        | 0.051                |
| Adverse-risk                                          | 5/22 (22.7%)         | 9/46 (19.5%)          | 8/47 (17.0%)          | 0.850                |

<sup>a)</sup>Early death due to any cause (with or without aplasia) within 56 days after chemotherapy. <sup>b)</sup>P < 0.05. Abbreviations: CTx, chemotherapy; HCT, hematopoietic cell transplantation.

**Supplementary Table 2.** Early treatment outcomes according to the intensity of the cytarabine-based induction chemotherapy.

| Total (N=443)                                         | IDA/ARA 3/7 (N=283) | IDA/ARA 3/10 (N=76) | IDA/ARA 5/10 (N=84) | P                   |
|-------------------------------------------------------|---------------------|---------------------|---------------------|---------------------|
| Post-induction early death <sup>a)</sup> (N=19, 4.3%) | 7 (2.5%)            | 5 (6.6%)            | 7 (8.3%)            | 0.037 <sup>b)</sup> |
| ≤ 55 yr (N=358)                                       | 5/215 (2.3%)        | 2/66 (3.0%)         | 5/77 (6.5%)         | 0.216               |
| > 55 yr (N=85)                                        | 2/68 (2.9%)         | 3/10 (30.0%)        | 2/7 (28.6%)         | 0.002 <sup>b)</sup> |
| Favorable-risk (N=81)                                 | 1/43 (2.3%)         | 1/19 (5.3%)         | 1/19 (5.3%)         | 0.783               |
| Intermediate-risk (N=242)                             | 3/162 (1.9%)        | 0/33 (0.0%)         | 4/47 (8.5%)         | 0.032 <sup>b)</sup> |
| Adverse-risk (N=109)                                  | 2/69 (2.9%)         | 4/22 (18.2%)        | 2/18 (11.1%)        | 0.045 <sup>b)</sup> |
| CR after induction CTx (N=312, 70.4%)                 | 194 (68.6%)         | 59 (77.6%)          | 59 (70.2%)          | 0.305               |
| ≤ 55 yr                                               | 145/215 (67.4%)     | 53/66 (80.3%)       | 54/77 (70.1%)       | 0.135               |
| > 55 yr                                               | 49/68 (72.1%)       | 6/10 (60.0%)        | 5/7 (71.4%)         | 0.736               |
| Favorable-risk                                        | 37/43 (86.0%)       | 18/19 (94.7%)       | 18/19 (94.7%)       | 0.425               |
| Intermediate-risk                                     | 111/162 (68.5%)     | 27/33 (81.8%)       | 31/47 (66.0%)       | 0.257               |
| Adverse-risk                                          | 40/69 (58.0%)       | 13/22 (59.1%)       | 10/18 (55.6%)       | 0.974               |
| Final CR achievement (N=367, 82.8%)                   | 241 (85.2%)         | 63 (82.9%)          | 63 (75.0%)          | 0.096               |
| ≤ 55 yr                                               | 183/215 (85.1%)     | 57/66 (86.4%)       | 58/77 (75.3%)       | 0.107               |
| > 55 yr                                               | 58/68 (85.3%)       | 6/10 (60.0%)        | 5/7 (71.4%)         | 0.127               |
| Favorable-risk                                        | 41/43 (95.3%)       | 18/19 (94.7%)       | 18/19 (94.7%)       | 0.992               |
| Intermediate-risk                                     | 135/162 (83.3%)     | 28/33 (84.8%)       | 34/47 (72.3%)       | 0.201               |
| Adverse-risk                                          | 59/69 (85.5%)       | 16/22 (72.7%)       | 11/18 (61.1%)       | 0.057               |
| Relapse before HCT (N=79, 21.5%)                      | 57/241 (23.6%)      | 10/63 (15.9%)       | 12/63 (19.0%)       | 0.356               |
| ≤ 55 yr                                               | 35/183 (19.1%)      | 8/57 (14.0%)        | 11/58 (18.9%)       | 0.672               |
| > 55 yr                                               | 22/58 (37.9%)       | 2/6 (33.3%)         | 1/5 (20.0%)         | 0.717               |
| Favorable-risk                                        | 9/41 (21.9%)        | 0/18 (0.0%)         | 2/18 (11.1%)        | 0.077               |
| Intermediate-risk                                     | 26/135 (19.2%)      | 5/28 (17.8%)        | 5/34 (14.7%)        | 0.827               |
| Adverse-risk                                          | 18/59 (30.5%)       | 5/16 (31.2%)        | 5/11 (45.4%)        | 0.619               |

<sup>a)</sup>Early death due to any cause (with or without aplasia) within 56 days after chemotherapy. <sup>b)</sup>P < 0.05. Abbreviations: CTx, chemotherapy; HCT, hematopoietic cell transplantation.
